Anesthesiology  
1996; 85:565-73  
© 1996 American Society of Anesthesiologists, Inc.  
Lippincott-Raven Publishers

## ***Sympatholytic and Minimum Anesthetic Concentration-sparing Responses are Preserved in Rats Rendered Tolerant to the Hypnotic and Analgesic Action of Dexmedetomidine, a Selective $\alpha_2$ -adrenergic Agonist***

Bradford C. Rabin, B.A.,\* Kristina Reid, B.S.,† Tian-Zhi Guo, M.D.,† Eva Gustafsson, M.D.,‡  
Chousheng Zhang, M.D.,† Mervyn Maze, M.B.Ch.B.§

**Background:** The development of tolerance to the sympatholytic and anesthetic-reducing effects of  $\alpha_2$  agonists after prolonged administration of dexmedetomidine and how the number of available  $\alpha_2$  adrenoceptors affects these dexmedetomidine-induced responses was studied.

**Methods:** The sympatholytic action of acute and chronic (3 and 10  $\mu\text{g} \cdot \text{kg}^{-1} \cdot \text{h}^{-1}$  for 7 days) dexmedetomidine, was assessed by the decrease in norepinephrine turnover in the locus coeruleus and hippocampus. The anesthetic-reducing effect of chronic (7 days) dexmedetomidine (5 and 10  $\mu\text{g} \cdot \text{kg}^{-1} \cdot \text{h}^{-1}$ ) was studied by determining the minimum alveolar concentration (MAC) for halothane that prevented rats from responding to a supramaximal noxious stimulus of dexmedetomidine (10 or 30  $\mu\text{g} \cdot \text{kg}^{-1}$ ), doses in the steep part of the dose-response curve.

The receptor reserve for the norepinephrine turnover and anesthetic-sparing responses to dexmedetomidine was delineated with 0.3–1.0  $\text{mg} \cdot \text{kg}^{-1}$  N-ethoxycarbonyl-2-ethoxy-1,2-dihydroquinoline, an irreversible alkylating agent.

**Results:** After chronic administration of dexmedetomidine at both doses, acute dexmedetomidine significantly decreased norepinephrine turnover in the hippocampus and locus coeruleus. The baseline minimum anesthetic concentration (MAC) and the MAC-sparing effect to acutely administered dexmedetomidine were preserved after chronic dexmedetomidine treatment. In the N-ethoxycarbonyl-2-ethoxy-1,2-dihydroqui-

noline experiments, the dexmedetomidine-induced norepinephrine turnover effect required less than 20% and greater than 4%  $\alpha_2$  adrenoceptor availability in the locus coeruleus and the dexmedetomidine induced MAC-sparing effect required less than 40% and greater than 20%  $\alpha_2$  adrenoceptor availability in the locus coeruleus.

**Conclusion:** Tolerance does not develop for either the sympatholytic or MAC-sparing actions of dexmedetomidine, although it is present for the hypnotic response. The durable quality of the sympatholytic and MAC-sparing responses to dexmedetomidine after chronic treatment is explained by a comparatively larger receptor reserve than is needed for the hypnotic and analgesic responses, which are blunted by the same drug treatment regimen. (Key words: Brain: hippocampus; locus coeruleus. Sympathetic nervous system,  $\alpha_2$ -adrenergic agonists: dexmedetomidine. Sympathetic nervous system, catecholamines: norepinephrine. Receptors:  $\alpha_2$  adrenoceptor. Treatment: chronic.

THE antihypertensive action of  $\alpha_2$  agonists is exerted at many levels including their ability to inhibit the release of norepinephrine in both central and peripheral adrenergic pathways. This inhibitory action on norepinephrine release is referred to as their sympatholytic action.

Recent demonstrations of therapeutic indications for  $\alpha_2$ -adrenergic agonists have led to multiple uses of this class of drug in the perioperative period.<sup>1</sup> For example,  $\alpha_2$ -adrenergic agonists are efficacious for anxiolysis,<sup>2</sup> preoperative sedation,<sup>3</sup> and decreasing anesthetic requirements for volatile,<sup>4</sup> opioid,<sup>5</sup> and hypnotic induction agents.<sup>6</sup> Additionally,  $\alpha_2$ -adrenergic agonists minimize hemodynamic fluctuations,<sup>7</sup> facilitate induced hypotensive techniques,<sup>8</sup> decrease postoperative shivering,<sup>3,9</sup> decrease oxygen utilization,<sup>10</sup> and may even be effective in protecting against ischemic damage to the brain<sup>11</sup> and heart.<sup>12</sup>

Because of the perceived benefit of these compounds

\* Medical Student.

† Research Associate.

‡ Visiting scholar.

§ Professor in Anesthesiology.

Received from the Department of Anesthesia, Stanford University School of Medicine, and Anesthesiology Service Veterans Affairs Hospital, Palo Alto, California. Submitted for publication September 28, 1995. Accepted for publication May 3, 1996. Supported by the Medical Scholars Program, Stanford University, National Institutes of Health (GM 30232).

Address reprint requests to Mr. Rabin: Office of Student Affairs, Stanford University, Stanford University School of Medicine, Stanford, California 94305.

at each stage in the surgical patient's care, we have advocated that subacute administration of  $\alpha_2$  agonists should encompass the entire perioperative period.<sup>13</sup> The regular practice of prolonged use of  $\alpha_2$  agonists in the management of chronic hypertension has clarified certain alterations in behavioral effects that accompany extended administration. While the beneficial antihypertensive effect is sustained for a period of years; the unwanted side effects, such as sedation, are relatively short-lived.<sup>14</sup> This differential sensitivity to chronic drug treatment can be explained by differences in the efficiency of signal transduction. The greater the efficiency with which a signal is transduced, the fewer the receptors that need to be activated to achieve a desired response. The most efficient responses have a built-in reserve that sustains the response even when the transduction mechanism is disrupted.

The development of tolerance is a ubiquitous biologic process in which responsiveness decreases with continuing exposure. While this has been particularly well characterized for responses mediated by adrenoceptors of the  $\beta$  and  $\alpha_1$  subclasses,<sup>15</sup> little is known about responses mediated by the  $\alpha_2$  adrenoceptors. We recently demonstrated that tolerance develops to both the hypnotic<sup>16</sup> and analgesic<sup>17</sup> effects of  $\alpha_2$  agonists after chronic treatment with dexmedetomidine. Whether tolerance develops similarly for other potentially useful perioperative effects of  $\alpha_2$  agonists is not known. We now report on the sympatholytic and anesthetic-sparing actions of dexmedetomidine after chronic administration.

## Methods

### Animal Preparation

Two hundred twenty-three male Sprague-Dawley rats (weighing 250–300 g) were chosen as the experimental model after approval of the experimental protocol by the Animal Care and Use Committee at the Palo Alto Veterans Affairs Medical Center. Rat littermates were stratified to match weight distribution in the control and treated groups as closely as possible. All behavioral tests and animal deaths occurred between 9 AM and 1 PM.

**Continuous Drug Administration.** Rats were exposed to the same conditions that were demonstrated to induce tolerance to the hypnotic action of dexmedetomidine, an  $\alpha_2$ -adrenergic agonist.<sup>16,17</sup> Briefly, dexmedetomidine was chronically administered using Al-

zet osmotic minipumps (Model 2002 or 1007D Alza, Palo Alto, CA), which discharge their contents at a mean pumping rate of  $0.48 \pm 0.02 \mu\text{l} \cdot \text{h}^{-1}$ . The pumps were loaded to deliver 3, 5, or  $10 \mu\text{g} \cdot \text{kg}^{-1} \cdot \text{h}^{-1}$  for 7 days. The pumps were inserted subcutaneously into the dorsal thoracic region during halothane anesthesia. In the initial experiments control animals also had the osmotic pumps containing only the vehicle implanted. This group did not differ in behavioral response from sham-operated control animals. Therefore, the latter were used.

**Depletion of  $\alpha_2$  Adrenoceptor Reserve.** Depletion of  $\alpha_2$  adrenoceptors was produced with N-ethoxycarbonyl-2-ethoxy-1,2-dihydroquinoline (EEDQ), which covalently binds and permanently inactivates  $\alpha_2$  adrenoceptors; therefore, responsiveness to  $\alpha_2$  agonists is dependent on the recovery of the newly expressed receptor population.<sup>18</sup> This compound also is capable of rendering serotonergic and dopaminergic receptors dysfunctional *via* alkylation. Rats received 0.3 or  $1.0 \text{ mg} \cdot \text{kg}^{-1}$  EEDQ subcutaneously.

**Halothane Minimum Alveolar Concentration Testing.** As previously described, the sensitivity to halothane was determined by measuring the MAC, which prevents a response to a supramaximal stimulus.<sup>19</sup> Briefly, halothane was vaporized in oxygen at a flow rate of  $5 \text{ l} \cdot \text{min}^{-1}$  and introduced into a methyl methacrylate polymer exposure chamber. The response of animals to supramaximal noxious stimulus was assessed by applying a 6" hemostat to the first ratchet position on the middle portion of the tail for 1 min. A positive response was noted if the rat moved purposefully in response to tail clamping. The individual testing for MAC was unblinded to the treatment.

**Neurochemical Measurement.** To measure monoamine turnover, animals received the vehicle or 10 and  $30 \mu\text{g} \cdot \text{kg}^{-1}$  dexmedetomidine intraperitoneally and were killed 30 min later by decapitation after narcosis induced by a 30-s exposure to carbon dioxide. The locus coeruleus (LC) was removed from each side and the hippocampus from the left side of the freshly harvested brain. Samples were sonicated in an ice cold 5% perchloric acid solution and centrifuged to precipitate proteins and membranes. The supernatant was filtered to exclude molecules exceeding 5,000 daltons. These samples were stable for up to 3 months when stored at  $-80^\circ\text{C}$ . The biogenic amines were assayed with high performance liquid chromatography with electrochemical detection, as previously described.<sup>20</sup>

The ratio of the concentrations of the major me-

TOLERANCE TO

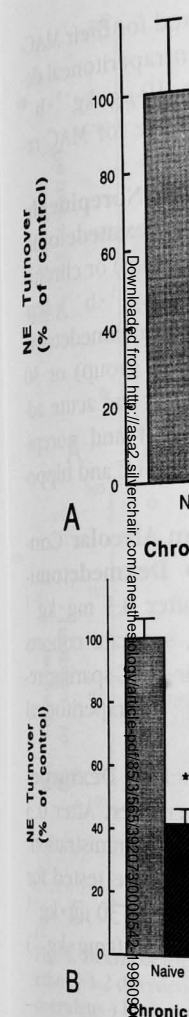

Fig. 1. Effect of chronic dexmedetomidine on norepinephrine turnover in the locus coeruleus and hippocampus of rats with osmotic pumps (sham-operated groups) or sham-operated rats were administered dexmedetomidine (10  $\mu\text{g} \cdot \text{kg}^{-1} \cdot \text{h}^{-1}$ ) peritoneally and the results were normalized to 100%.  $P < 0.005$  (log rank test)  $SP = 7-8$  per group.

tabolite of a brain monoamine neurotransmitter. Standing that high amine neurotransmitter at presynaptic terminal at increased concentration.



TOLERANCE TO  $\alpha_2$  ADRENERGIC AGONISTS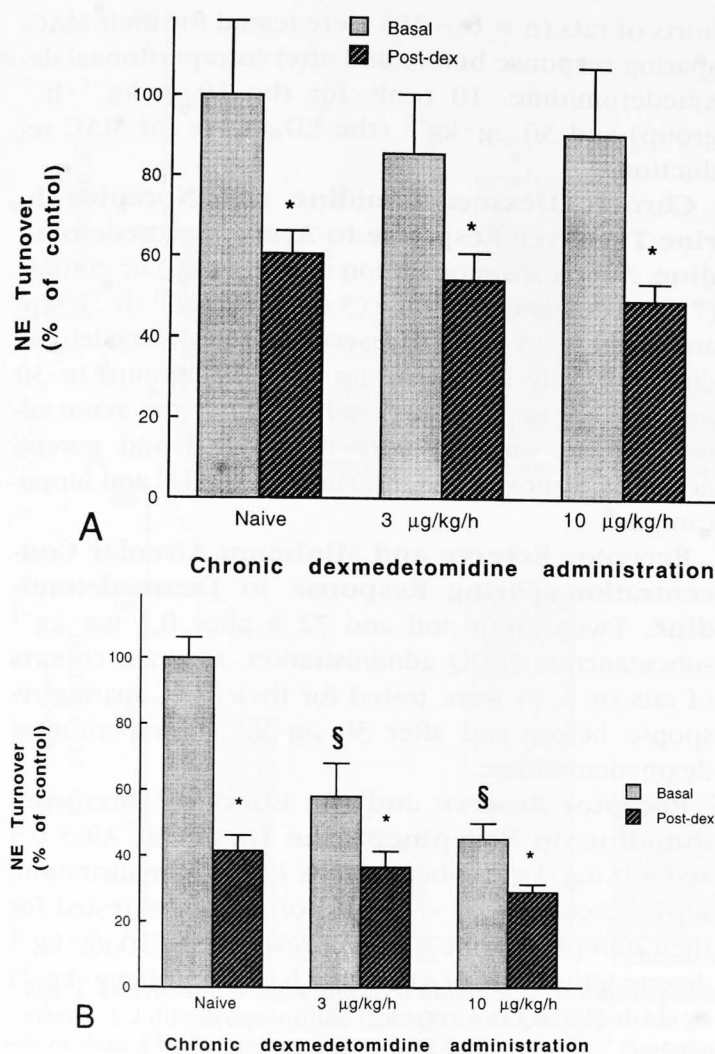

**Fig. 1.** Effect of chronic dexmedetomidine administration on norepinephrine turnover  $\pm$  acute dexmedetomidine in the (A) locus coeruleus and (B) hippocampus. Rats were implanted with osmotic pumps set to deliver 3 or 10  $\mu\text{g} \cdot \text{kg}^{-1} \cdot \text{h}^{-1}$  (tolerant groups) or sham-operated (naive group). On the 7th day, rats were administered 30  $\mu\text{g} \cdot \text{kg}^{-1}$  dexmedetomidine intraperitoneally and the turnover of norepinephrine was determined. Data are expressed as a percentage of control animals normalized to 100%. ANOVA:  $P < 0.0001$  (hippocampus) and  $P < 0.005$  (locus coeruleus) \* $P < 0.05$  compared with basal state (Fisher test) § $P < 0.0001$  compared with naive group.  $n = 7-8$  per group.

metabolite of a brain monoamine neurotransmitter to brain monoamine itself is used as an index of the overall turnover rate of the synaptic monoamine neurotransmitter. Underlying this ratio is the understanding that high concentrations of the monoamine neurotransmitter such as norepinephrine will reduce neuronal activity by acting as an autoregulator at presynaptic  $\alpha_2$  receptors. Conversely, increased concentrations of the neuronal metabolite,

such as 3,4-dihydroxyphenylglycolaldehyde or 3-methoxy-4-hydroxyphenylglycol (MHPG), are associated with increased neuronal firing. The foregoing assumes that the formation and elimination of the monoamines and their metabolites are proportional to their concentrations.<sup>21</sup>

**Receptor Density.**  $\alpha_2$  Receptor density was measured in the LC 4 or 24 h after EEDQ administration. Animals were killed by decapitation under carbon dioxide narcosis and the LCs (2 LCs/rat) were harvested. Tissue was homogenized in 500  $\mu\text{l}$  ice-cold Tris, 50 mM, EDTA 0.8 mM buffer pH 7.5. After centrifugation

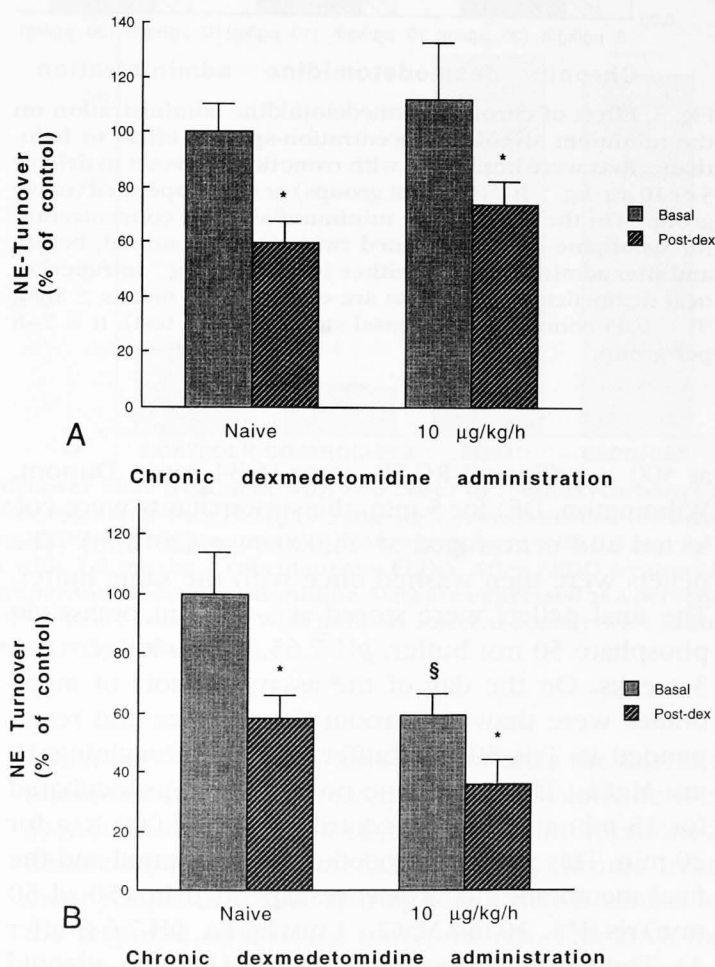

**Fig. 2.** Effect of chronic dexmedetomidine administration on norepinephrine turnover  $\pm$  acute dexmedetomidine in the (A) locus coeruleus and (B) hippocampus. Rats were implanted with osmotic pumps set to deliver 10  $\mu\text{g} \cdot \text{kg}^{-1} \cdot \text{h}^{-1}$  (tolerant groups) or sham-operated (naive group). On the 7th day, rats were administered 10  $\mu\text{g} \cdot \text{kg}^{-1}$  dexmedetomidine intraperitoneally and the turnover of norepinephrine was determined. Data are expressed as a percentage of control animals normalized to 100%. ANOVA:  $P < 0.05$  (hippocampus) and  $P < 0.05$  (locus coeruleus) compared with basal state (Fisher test) § $P < 0.05$  compared with naive group.  $n = 7-8$  per group.

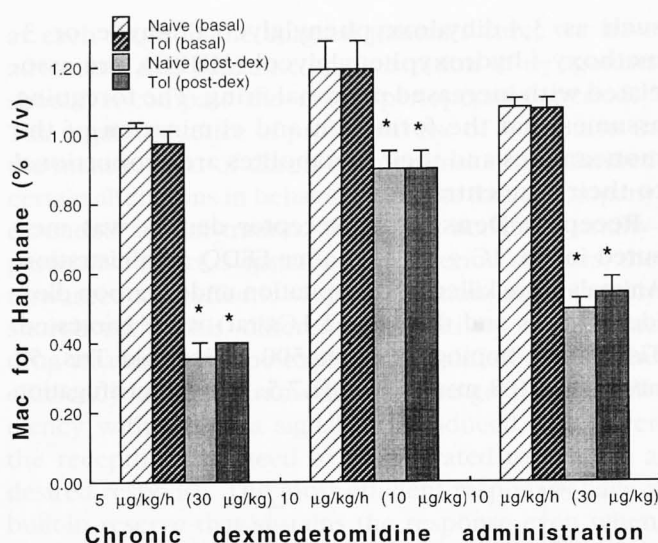

Fig. 3. Effect of chronic dexmedetomidine administration on the minimum alveolar concentration-sparing effect to halothane. Rats were implanted with osmotic pumps set to deliver 5 or 10  $\mu\text{g} \cdot \text{kg}^{-1} \cdot \text{h}^{-1}$  (tolerant groups) or sham-operated (naive group). On the 7th day, the minimum alveolar concentration for halothane was determined twice in each animal, before and after administration of either 10 or 30  $\mu\text{g} \cdot \text{kg}^{-1}$  intraperitoneal dexmedetomidine. Data are expressed as means  $\pm$  SEM. \* $P < 0.05$  compared with basal state (paired  $t$  test).  $n = 7-8$  per group.

at  $500 \times g$  (Sorvall RC-5B, rotor SS-34 rotor, Dupont, Wilmington, DE) for 5 min, the supernatants were collected and centrifuged at  $44,000 \times g$  (20 min). The pellets were then washed once with the same buffer. The final pellets were stored at  $-80^\circ\text{C}$  in potassium phosphate 50 mM buffer, pH 7.65, for no longer than 3 weeks. On the day of the assay, aliquots of membranes were thawed at room temperature and resuspended in Tris 50 mM buffer, pH 7.6, containing 10 mM  $\text{MgCl}_2$ . The membrane preparation was incubated for 15 min at  $37^\circ\text{C}$  and centrifuged at  $44,000 \times g$  for 20 min. This washing procedure was repeated and the final membrane pellet was resuspended in 150  $\mu\text{l}$  50 mM Tris-HCL, 10 mM  $\text{MgCl}_2$ , 1 mM EGTA, pH 7.6 (buffer A). The binding procedures on the LC were adapted from Baron and Siegel.<sup>22</sup>

#### Experimental Regimens

**Chronic Dexmedetomidine and the Minimum Alveolar Concentration-sparing Response to Acute Dexmedetomidine.** After a sham operation (naive group) or chronic (7 days) dexmedetomidine administration (5 and 10  $\mu\text{g} \cdot \text{kg}^{-1} \cdot \text{h}^{-1}$ ), separate co-

horts of rats ( $n = 6-10$ ) were tested for their MAC-sparing response before and after intraperitoneal dexmedetomidine, 10 (only for the 10- $\mu\text{g} \cdot \text{kg}^{-1} \cdot \text{h}^{-1}$  group) and 30  $\mu\text{g} \cdot \text{kg}^{-1}$  (the  $\text{ED}_{50}$  dose for MAC reduction).<sup>19</sup>

**Chronic Dexmedetomidine and Norepinephrine Turnover Response to Acute Dexmedetomidine.** After a sham operation (naive group) or chronic (7 days) dexmedetomidine (3 or 10  $\mu\text{g} \cdot \text{kg}^{-1} \cdot \text{h}^{-1}$ ), separate cohorts ( $n = 7-8$ ) reserved either dexmedetomidine, 10 (only for the 10- $\mu\text{g} \cdot \text{kg}^{-1} \cdot \text{h}^{-1}$  group) or 30  $\mu\text{g} \cdot \text{kg}^{-1}$ , or saline. Thirty minutes after the acute administration, animals were decapitated and norepinephrine turnover was measured in the LC and hippocampus.

**Receptor Reserve and Minimum Alveolar Concentration-sparing Response to Dexmedetomidine.** Twenty-four and 72 h after 0.3  $\text{mg} \cdot \text{kg}^{-1}$  subcutaneous EEDQ administration, separate cohorts of rats ( $n = 7$ ) were tested for their MAC-sparing response before and after 30  $\mu\text{g} \cdot \text{kg}^{-1}$  intraperitoneal dexmedetomidine.

**Receptor Reserve and the Effect of Dexmedetomidine on Norepinephrine Turnover.** After 0.3 and 1.0  $\text{mg} \cdot \text{kg}^{-1}$  subcutaneous EEDQ administration, separate cohorts ( $n = 5-8$ ) of rats were tested for their norepinephrine turnover response to 30  $\mu\text{g} \cdot \text{kg}^{-1}$  dexmedetomidine or saline at 4 h (EEDQ 1.0  $\text{mg} \cdot \text{kg}^{-1}$ ) or 24 h (EEDQ 0.3  $\text{mg} \cdot \text{kg}^{-1}$ ).

#### Statistics

Data are expressed as mean  $\pm$  SEM. The results of multiple groups were analyzed by analysis of variance followed by Fisher's *post hoc* test. Comparison between two groups was performed by  $t$  test for unpaired data. A  $P$  value  $< 0.05$  was considered statistically significant.

#### Results

**Norepinephrine Turnover and Chronic Dexmedetomidine.** In the LC (fig. 1A), chronic administration of both dexmedetomidine doses (3 and 10  $\mu\text{g} \cdot \text{kg}^{-1} \cdot \text{h}^{-1}$ ) fails to alter the MHPG/norepinephrine ratio. Acute administration of dexmedetomidine (30  $\mu\text{g} \cdot \text{kg}^{-1}$  intraperitoneal) to animals receiving chronic treatment, decreased ( $P < 0.05$ ) the MHPG/norepinephrine ratio.

In the hippocampus (fig. 1B), chronic administra-

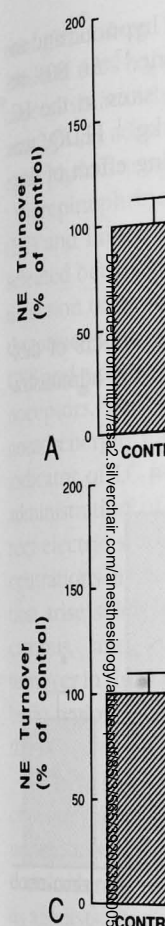

Fig. 4. Dexmedetomidine (30  $\mu\text{g} \cdot \text{kg}^{-1}$ ) reverses the increase in norepinephrine turnover induced by 30  $\mu\text{g} \cdot \text{kg}^{-1}$  intraperitoneal EEDQ. Rats were injected with 30  $\mu\text{g} \cdot \text{kg}^{-1}$  intraperitoneal EEDQ 4 h before sacrifice. Data are expressed as mean  $\pm$  SEM. \* $P < 0.05$  compared with control (Fisher test).



TOLERANCE TO  $\alpha_2$  ADRENERGIC AGONISTS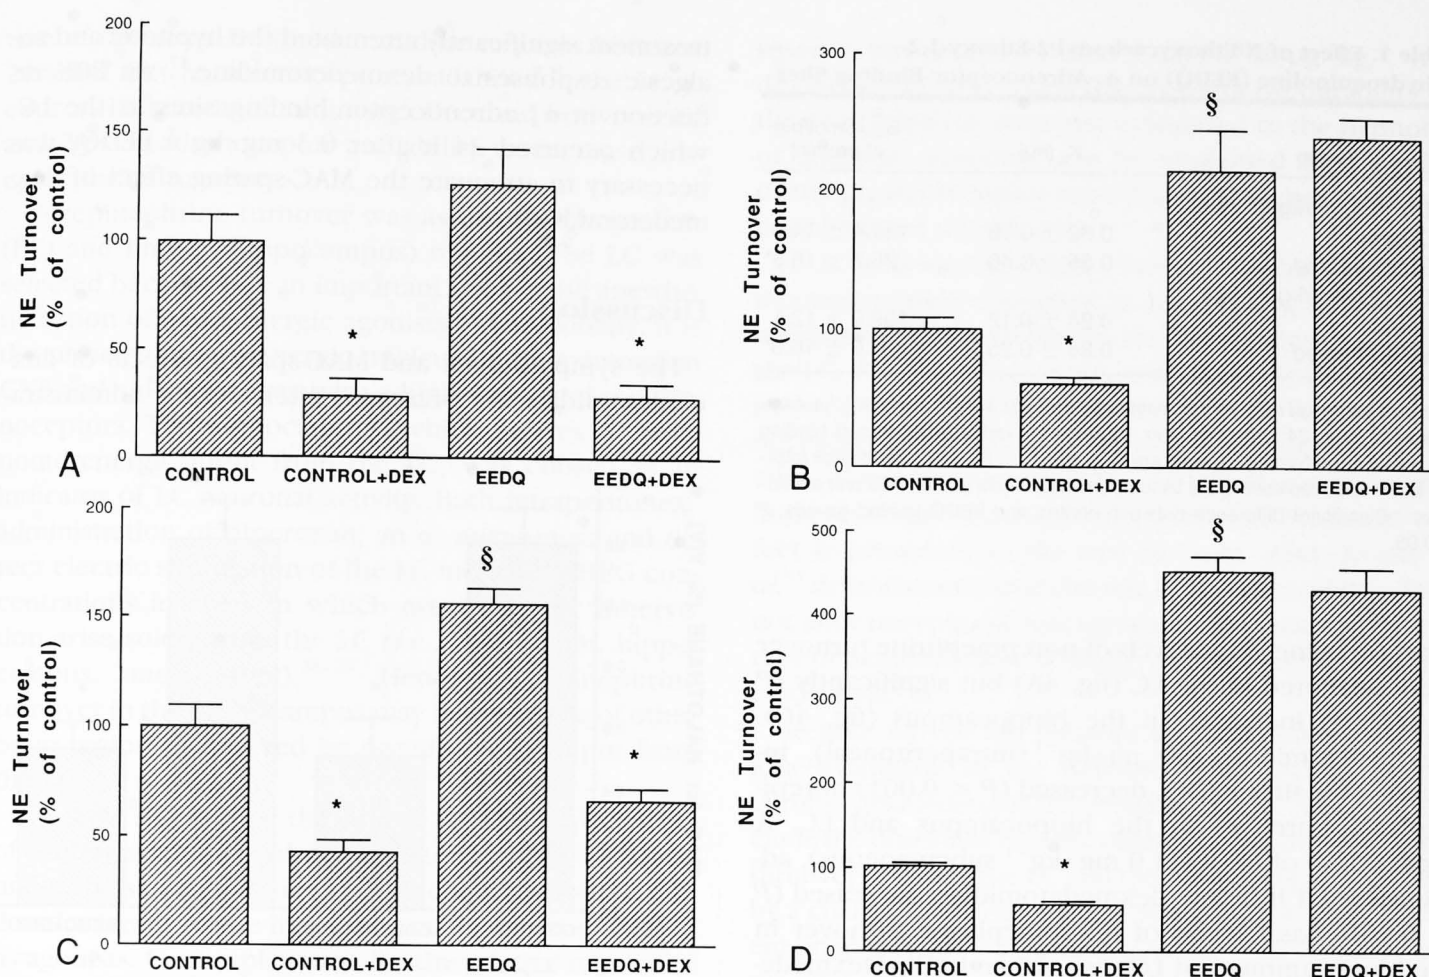

Fig. 4. Dexmedetomidine-induced changes in norepinephrine turnover after treatment with two doses of N-ethoxycarbonyl-2-ethoxy-1,2 dihydroquinoline (EEDQ). (A) locus coeruleus 24 h after treatment with EEDQ (0.3 mg·kg<sup>-1</sup> subcutaneous), (B) locus coeruleus 24 h after treatment with 0.3 mg·kg<sup>-1</sup> subcutaneous EEDQ, (C) hippocampus 4 h after treatment with 1.0 mg·kg<sup>-1</sup> subcutaneous EEDQ, and (D) hippocampus 4 h after treatment with 1.0 mg·kg<sup>-1</sup> subcutaneous EEDQ. After EEDQ treatment, rats were injected with saline or dexmedetomidine 30  $\mu$ g·kg<sup>-1</sup> intraperitoneal dexmedetomidine. Data are expressed as a percentage of control animals normalized to 100%. ANOVA:  $P < 0.001$  \* $P < 0.001$  compared with animals injected acutely with saline (Fisher test) § $P < 0.001$  compared with non-EEDQ injected group.  $n = 5-8$  per group.

tion of both dexmedetomidine doses (3 and 10  $\mu$ g·kg<sup>-1</sup>·h<sup>-1</sup>) reduces ( $P < 0.0001$ ) the MHPG/norepinephrine ratio compared to naive animals. Acute administration of dexmedetomidine (30  $\mu$ g·kg<sup>-1</sup> intraperitoneal) to animals receiving chronic treatment, results in a further reduction ( $P < 0.05$ ) in the MHPG/norepinephrine ratio.

Similar findings were seen in both the LC (fig. 2A) and the hippocampus (fig. 2B) after acute administration of dexmedetomidine (10  $\mu$ g·kg<sup>-1</sup> intraperitoneal) to animals receiving chronic treatment (10  $\mu$ g·kg<sup>-1</sup>·h<sup>-1</sup> dexmedetomidine).

**The Minimum Alveolar Concentration-sparing Effect and Chronic Dexmedetomidine.** Chronic administration of both dexmedetomidine doses (5 and

10  $\mu$ g·kg<sup>-1</sup>·h<sup>-1</sup>) for 7 days did not alter the baseline minimum anesthetic concentration for halothane (fig. 3). Acute administration of 30  $\mu$ g·kg<sup>-1</sup> intraperitoneal dexmedetomidine to animals receiving chronic treatment results in a MAC-sparing effect that is similar to the response seen in the naive animals. The MAC for halothane after acute dexmedetomidine was decreased ( $P < 0.0001$ ) in both the tolerant and naive groups. Analogous findings were seen after acute administration of 10  $\mu$ g·kg<sup>-1</sup> intraperitoneal dexmedetomidine to animals receiving chronic dexmedetomidine treatment (10  $\mu$ g·kg<sup>-1</sup>·h<sup>-1</sup>).

**Receptor Reserve and the Effect of Dexmedetomidine on Norepinephrine Turnover.** After EEDQ (0.3 mg·kg<sup>-1</sup> subcutaneous), administration 24

**Table 1. Effect of N-Ethoxycarbonyl-2-Ethoxy-1,2-Dihydroquinoline (EEDQ) on  $\alpha_2$ -Adrenoceptor Binding Sites**

| Group                    | $K_d$ (nM)      | $B_{max}$ (fmol/mg of protein) |
|--------------------------|-----------------|--------------------------------|
| EEDQ (0.3 mg/kg at 24 h) |                 |                                |
| Control                  | $0.32 \pm 0.16$ | $126.4 \pm 14.6$               |
| EEDQ-treated             | $0.35 \pm 0.46$ | $25.7 \pm 16.3^*$              |
| EEDQ (1.0 mg/kg at 4 h)  |                 |                                |
| Control                  | $0.24 \pm 0.12$ | $109.2 \pm 12.1$               |
| EEDQ-treated             | $0.34 \pm 0.25$ | $4.6 \pm 16.3^*$               |

Separate groups of rats were administered EEDQ 0.3 and 1.0  $\text{mg} \cdot \text{kg}^{-1}$  subcutaneously, and, 24 and 72 h later, respectively radiolabeled-ligand binding studies were performed. Results are  $B_{max}$  and  $K_d$  = B1 95% confidence interval. Each value represents the tissue from 10 animals pooled into one experiment. \* Significant difference between control and EEDQ-treated groups,  $P < 0.05$ .

h before saline, basal levels of norepinephrine turnover were unaltered in the LC (fig. 4A) but significantly ( $P < 0.0001$ ) increased in the hippocampus (fig. 4C). Dexmedetomidine ( $30 \mu\text{g} \cdot \text{kg}^{-1}$  intraperitoneal), injected 24 h after EEDQ, decreased ( $P < 0.001$ ) norepinephrine turnover in the hippocampus and LC. A higher dose of EEDQ ( $1.0 \text{ mg} \cdot \text{kg}^{-1}$  subcutaneous), administered 4 h before dexmedetomidine, increased ( $P < 0.001$ ) basal levels of norepinephrine turnover in the hippocampus and LC (figs. 4B and 4D). Dexmedetomidine ( $30 \mu\text{g} \cdot \text{kg}^{-1}$  intraperitoneal) injected after this EEDQ treatment failed to decrease norepinephrine turnover. Four hours after  $1.0 \text{ mg} \cdot \text{kg}^{-1}$  EEDQ (table 1), there was a 96% reduction in  $\alpha_2$  adrenoceptor binding sites in the LC.

**Receptor Reserve and the Halothane MAC-sparing Effect of Dexmedetomidine.** EEDQ ( $0.3 \text{ mg} \cdot \text{kg}^{-1}$  subcutaneous), administered 72 and 24 h before testing, did not alter the baseline MAC for halothane (figs. 5A and 5B). Dexmedetomidine's MAC-sparing effect was completely blocked in rats treated with EEDQ 24 h before acute administration of  $30 \mu\text{g} \cdot \text{kg}^{-1}$  intraperitoneal dexmedetomidine. In naive rats or rats treated with EEDQ 72 h earlier, the MAC-sparing effect to acute administration of dexmedetomidine remained intact ( $P < 0.0001$ ).

Treatment with EEDQ produced a dose-dependent reduction in  $\alpha_2$  adrenoceptor binding sites in the LC (table 1) without affecting the binding affinity (dissociation constant). The dose-dependent reduction in  $\alpha_2$  adrenoceptor binding sites for  $\alpha_2$  adrenoceptors in the LC was reduced by 60% in rats 72 h after  $0.3 \text{ mg} \cdot \text{kg}^{-1}$  EEDQ injection.<sup>17</sup> Previously, we reported that this

treatment significantly attenuated the hypnotic and analgesic responses to dexmedetomidine.<sup>17</sup> An 80% reduction in  $\alpha_2$  adrenoceptor binding sites in the LC, which occurred 24 h after  $0.3 \text{ mg} \cdot \text{kg}^{-1}$  EEDQ, was necessary to attenuate the MAC-sparing effect of dexmedetomidine.

## Discussion

The sympatholytic and MAC-sparing effects of dexmedetomidine are preserved after chronic administra-

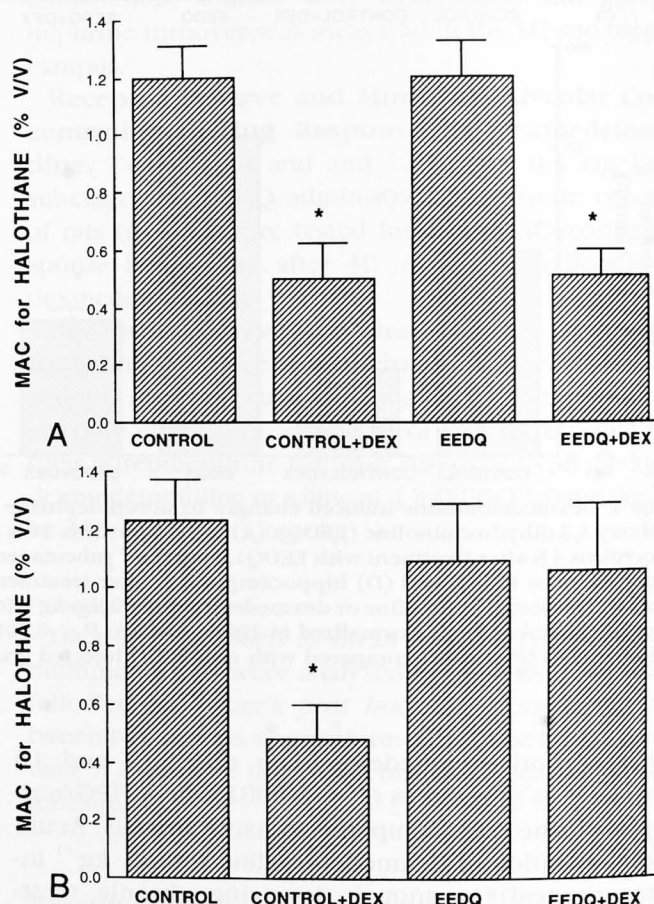

**Fig. 5. The halothane minimum alveolar concentration-sparing effect of dexmedetomidine after treatment with N-ethoxycarbonyl-2-ethoxy-1,2-dihydroquinoline.** In separate groups of rats, the minimum alveolar concentration for halothane was determined (A) 72 h after treatment with  $0.3 \text{ mg} \cdot \text{kg}^{-1}$  subcutaneous N-ethoxycarbonyl-2-ethoxy-1,2-dihydroquinoline and (B) 24 h after treatment with  $0.3 \text{ mg} \cdot \text{kg}^{-1}$  subcutaneous N-ethoxycarbonyl-2-ethoxy-1,2-dihydroquinoline. The minimum alveolar concentration was determined twice in each animal, before and after administration of  $30 \mu\text{g} \cdot \text{kg}^{-1}$  intraperitoneal dexmedetomidine. Data are expressed as means  $\pm$  SEM. \* $P < 0.0001$  compared with basal state (paired t test).  $n = 7$  per group.



TOLERANCE TO  $\alpha_2$  ADRENERGIC AGONISTS

tion of the drug. Dexmedetomidine requires between 20% and 40%  $\alpha_2$  adrenoceptor availability in the LC to express its anesthetic-reducing effect and between 4% and 20%  $\alpha_2$  adrenoceptor availability to decrease norepinephrine turnover.

Norepinephrine turnover was assessed in brainstem (LC) and limbic (hippocampus) regions. The LC was selected because it is an important site for the anesthetic action of  $\alpha_2$ -adrenergic agonists.<sup>23</sup> Additionally, it is the principal noradrenergic nucleus in the mammalian CNS and a discrete area with a high density of  $\alpha_2$  adrenoceptors. The hippocampus, which derives all of its noradrenergic input from the LC, was chosen as an indicator of LC neuronal activity. Both intraperitoneal administration of piperoxan, an  $\alpha_2$  antagonist, and direct electric stimulation of the LC increase MHPG concentrations in areas in which noradrenergic innervation arise solely from the LC (i.e., cerebellum, hippocampus, and cortex).<sup>24-26</sup> Hence, norepinephrine turnover in the hippocampus may be reflective of other brain regions subserved by noradrenergic input from the LC.

We have shown that the central sympatholytic effect of acutely administered dexmedetomidine is sustained under the same conditions in which animals were rendered tolerant to the hypnotic and analgesic effects of  $\alpha_2$  agonists. One explanation for the relative resistance to desensitization may relate to a large receptor reserve for autoreceptor function. Several studies have demonstrated a large surplus of spare autoreceptors in various systems including dopaminergic,<sup>27</sup> serotonergic,<sup>28</sup> and  $\alpha_2$ -adrenergic.<sup>29-31</sup> Thus, it is possible that even if a large fraction of the  $\alpha_2$  autoreceptors are rendered non-functional, through uncoupling or internalization, the response transduced by the remaining receptors may still be intact. In animals treated with EEDQ, we demonstrated that greater than 4% and less than 20% of the  $\alpha_2$ -adrenoceptor population was required to produce the norepinephrine turnover effect of dexmedetomidine.

Previously, we have shown a correlation between receptor reserve and resistance to the induction of tolerance for  $\alpha_2$ -adrenergic responses.<sup>17</sup> The hypnotic response to dexmedetomidine, which has a receptor reserve of 23%, was decreased after 2 days of 3  $\mu\text{g} \cdot \text{kg}^{-1} \cdot \text{h}^{-1}$  dexmedetomidine administration. In contrast, the tail-flick analgesic response, which has a 40% receptor reserve, was decreased after 7 days of 10  $\mu\text{g} \cdot \text{kg}^{-1} \cdot \text{h}^{-1}$  dexmedetomidine, and the sympatholytic effect, which has a greater than 80% receptor

reserve, was unaffected after 7 days of 10  $\mu\text{g} \cdot \text{kg}^{-1} \cdot \text{h}^{-1}$  dexmedetomidine. Thus, the comparative durability of the sympatholytic response compared to the hypnotic or analgesic response can be explained by a significantly greater receptor reserve owing to more efficient coupling and transduction.

It is noteworthy that chronic administration of dexmedetomidine resulted in a significant decrease in norepinephrine turnover in the hippocampus but not the LC. This finding concurs with Rochette *et al.*<sup>32</sup> who showed that chronic clonidine fails to diminish the norepinephrine turnover, as judged by the rate of decline of norepinephrine after  $\alpha$ -methyltyrosine, in the brain stem and hypothalamus, while this inhibitory effect is preserved in the rest of brain. Also, Koulu *et al.*<sup>33</sup> demonstrated that chronic dexmedetomidine does not alter norepinephrine turnover, as measured by the rate of accumulation of dopa, in brain stem nuclei including the LC.

Because we did not measure the concentration of dexmedetomidine in the different brain regions during chronic dexmedetomidine infusion, we are unable to exclude the possibility that the difference in norepinephrine turnover between the LC and the hippocampus is caused by a change in the distribution of the drug in these different brain regions. We assume, however, that similar levels are attained in the LC and hippocampus because all tissues should be at equilibrium with the central compartment after seven days of dexmedetomidine infusion. Recent studies using a similar infusion regimen revealed that plasma concentrations have stabilized by the second day of drug administration.<sup>16</sup>

We should also consider the possibility that the  $\alpha_2$  adrenoceptor-effector mechanism in the hippocampus, but not the LC, is refractory to changes in sensitivity. Perhaps this difference in the sensitivity of the receptors is a function of their location in different brain regions. This explanation is supported by the observation that receptor reserve may be region specific. In studies with EEDQ,  $\alpha_2$  adrenoceptors regulating LC activity are characterized by a larger receptor reserve or are less sensitive to the influence of alkylation than are the population of  $\alpha_2$  adrenoceptors regulating norepinephrine utilization.<sup>31</sup> Moreover, regional variation in receptor sensitivity may be due to different subtypes of the  $\alpha_2$  receptor,<sup>34</sup> each with their respective intrinsic properties. This supposition is supported by the finding that chronic treatment with norepinephrine differentially downregulates  $\alpha_{2A}$  and  $\alpha_{2C}$ -adrenoceptor subtypes.<sup>35</sup>

### Anesthetic Requirements and Chronic Dexmedetomidine Infusion

Chronic dexmedetomidine infusion neither changed the MAC for halothane nor norepinephrine turnover in the LC. This lack of effect may be causally related. Initial theories maintained that the MAC for anesthesia reflected the summation of changes in many systems, including the noradrenergic system.<sup>36</sup> More recent hypotheses have asserted that alterations in neurotransmission in discrete brain regions, as opposed to a widespread depression of neurotransmission, are responsible for the dose of drug required to produce the anesthetic state. This idea was supported by the demonstration that both cyclopropane and halothane significantly and selectively changed neurotransmitter content in a few brain regions.<sup>37</sup> Consonant with this hypothesis was evidence showing the regional specificity of metabolic changes, namely cerebral glucose utilization, induced by anesthetic agents.<sup>38,39</sup> Both of the aforementioned studies note that the LC is one of the few discrete brain regions with significant, distinctive changes in neurotransmitter content and metabolic activity after halothane anesthesia.

Studies linking the LC and volatile anesthetics are further supported by a substantial body of evidence implicating noradrenergic neurons in the modulation of anesthetic requirements. Depletion of monoamines with central neurotoxins<sup>19,40</sup> and elevation of central amine levels with release enhancers, dextroamphetamine<sup>41</sup> or cocaine,<sup>42</sup> have produced corresponding decreases and increases in anesthetic potency. Therefore, it is expected that the absence of change in the MAC for anesthesia would be accompanied by unaltered norepinephrine turnover in the LC. The change in norepinephrine turnover that was noted in the hippocampus would not be expected to change MAC for anesthesia because this region has been physiologically linked to memory but not to consciousness.<sup>43</sup> Other sites in the central nervous system that have been suggested as possible sites for volatile anesthetic action include the spinal cord,<sup>44</sup> although the LC remains an important candidate site for the MAC-sparing effect, if only because of its role on the hypnotic<sup>45,46</sup> and analgesic<sup>47</sup> actions of  $\alpha_2$ -adrenergic agonists.

Analogous to the sympatholytic effect, the anesthetic-sparing effect of acutely administered dexmedetomidine was preserved in animals rendered tolerant to the hypnotic effect of the drug by chronic administration.<sup>16</sup> The comparatively refractory nature of dexmedetomidine's MAC-sparing effect may be explained by the existence of spare receptors: transduction of this behavioral response requires a relatively small fraction of the  $\alpha_2$  receptor population, less than 40% in the LC, such that it is unaffected by the reduction in receptor reserve elicited by chronic drug administration. Thus, the refractory quality of dexmedetomidine's MAC-sparing effect may be elucidated by the empirically established link between halothane anesthesia and neuronal activity in the LC, a discrete brain region with an unusual abundance of spare  $\alpha_2$ -adrenergic receptors.<sup>51</sup>

In summary, both the sympatholytic and MAC-sparing responses dexmedetomidine persist in rats rendered tolerant to the hypnotic and analgesic properties of dexmedetomidine. While this may be partially attributed to differences in receptor subtypes that mediate these responses, it is significant that there are large differences in receptor coupling and transduction for the individual responses. The result of this is that chronic treatment with  $\alpha_2$  agonists will cause efficacy to change for some but not all responses.

### References

1. Maze M, Tranquilli W:  $\alpha_2$  adrenoceptor agonists: Defining the role in clinical anesthesia. *ANESTHESIOLOGY* 1991; 74:581-605
2. Uhde T, Stein M, Vittone B, Siever L, Boulenger J, Klein E, Mellman T: Behavioral and physiologic effects of short-term and long-term administration of clonidine in panic disorder. *Arch Gen Psychiatry* 1989; 46:170-7
3. Flacke J, Bloor B, Flacke W, Wong D, Dazza S, Stead S, Laks H: Reduced narcotic requirement by clonidine with improved hemodynamic and adrenergic stability in patients undergoing coronary bypass surgery. *ANESTHESIOLOGY* 1987; 67:11-9
4. Aho M, Lehtinen A-M, Erkola O, Kallio A, Korttilä K: The effect of intravenously administered dexmedetomidine on perioperative hemodynamics and isoflurane requirements in patients undergoing abdominal hysterectomy. *ANESTHESIOLOGY* 1991; 74:997-1002
5. Ghignone M, Quintin L, Duke P, Kehler C, Calvillo O: Effects of clonidine on narcotic requirements and hemodynamic response during induction of fentanyl anesthesia and endotracheal intubation. *ANESTHESIOLOGY* 1986; 64:36-42
6. Aantaa R, Kanto J, Scheinin M, Kallio A, Scheinin H: Dexmedetomidine, an  $\alpha_2$  adrenoceptor agonist, reduces anesthetic requirements for patients undergoing minor gynecologic surgery. *ANESTHESIOLOGY* 1990; 73:230-5
7. Ghignone M, Calvillo O, Quintin L: Anesthesia and hypertension: The effect of clonidine on preoperative hemodynamics and isoflurane requirements. *ANESTHESIOLOGY* 1987; 67:3-10
8. Woodcock T, Millar R, Dixon F, Prys-Roberts C: Clonidine premedication for isoflurane induced hypotension. *Br J Anaesth* 1988; 60:388-94
9. Marshall H, Stoner H: Catecholaminergic  $\alpha$  receptors and shivering in the rat. *J Physiol (Lond)* 1979; 292:27-34
10. Quintin L, Viale J, Annat G, Hipen J, Butin E, Cottet-Emard J, Levron J, Bussery D, Maze M: Effect of clonidine on the hypnotic effect of halothane in rats. *ANESTHESIOLOGY* 1990; 73:392-5
11. Payen D, Quintin L: Clonidine decreases the hypnotic effect of halothane in rats. *ANESTHESIOLOGY* 1990; 73:392-5
12. Talke PO, Mangano DT: Dexmedetomidine on patients (abstract). *ANESTHESIOLOGY* 1991; 74:220-2
13. Segal I, Jarvis D: Effect of dexmedetomidine on the hypnotic effect of halothane in rats. *ANESTHESIOLOGY* 1991; 74:220-2
14. Ferder L: Insertion of dexmedetomidine in the treatment of hypertension. *Am J Hypertens* 1987; 1(suppl 1):10-15
15. Sibley DA, Benovic P: The effects of dexmedetomidine on membrane signaling by G-proteins. *ANESTHESIOLOGY* 1991; 74:220-2
16. Reid K, Hayashida M: Chronic administration of dexmedetomidine to rats: effects on the anesthetic requirements of halothane and fentanyl. *Biochem Behav* 1994; 39:55-62
17. Hayashida M, Guo Z: Effects of  $\alpha_2$ -adrenergic agonists on the anesthetic requirements of halothane and fentanyl in rats. *ANESTHESIOLOGY* 1991; 74:220-2
18. Meller E, Goldstein M: Carbonyl-2-ethoxy-1,2-dimethyl-3-phenyl-4-piperidine: A new  $\alpha_2$  adrenoceptor agonist. *ANESTHESIOLOGY* 1991; 74:220-2
19. Segal I, Sackey R: Clonidine decreases the anesthetic requirements of halothane and fentanyl in rats. *ANESTHESIOLOGY* 1991; 74:220-2
20. Matsuno M, Segal I: Clonidine decreases the anesthetic requirements of halothane and fentanyl in rats. *ANESTHESIOLOGY* 1991; 74:220-2
21. Smythe GA, Baron RM: The effect of dexmedetomidine on the anesthetic requirements of halothane and fentanyl in rats. *ANESTHESIOLOGY* 1991; 74:220-2
22. Baron RM, Siegelbaum SA: The effect of dexmedetomidine on the anesthetic requirements of halothane and fentanyl in rats. *ANESTHESIOLOGY* 1991; 74:220-2
23. Correa-Sales C, Jones BJ, Moore JH: The effect of dexmedetomidine on the anesthetic requirements of halothane and fentanyl in rats. *ANESTHESIOLOGY* 1991; 74:220-2
24. Jones BJ, Moore JH: The effect of dexmedetomidine on the anesthetic requirements of halothane and fentanyl in rats. *ANESTHESIOLOGY* 1991; 74:220-2
25. Bowden DM, Goldstein M: The effect of dexmedetomidine on the anesthetic requirements of halothane and fentanyl in rats. *ANESTHESIOLOGY* 1991; 74:220-2
26. Crawley J, Massimini M: The effect of dexmedetomidine on the anesthetic requirements of halothane and fentanyl in rats. *ANESTHESIOLOGY* 1991; 74:220-2
27. Meller E, Helms M: The effect of dexmedetomidine on the anesthetic requirements of halothane and fentanyl in rats. *ANESTHESIOLOGY* 1991; 74:220-2
28. Bohmacker K, Eger EI: The effect of dexmedetomidine on the anesthetic requirements of halothane and fentanyl in rats. *ANESTHESIOLOGY* 1991; 74:220-2



TOLERANCE TO  $\alpha_2$  ADRENERGIC AGONISTS

- Levron J, Bussery D, Motin J: Oxygen uptake after major abdominal surgery: Effect of clonidine. *ANESTHESIOLOGY* 1991; 74:236-41
11. Payen D, Quintin L, Plaisance P, Chiron B, Lhoste F: Head injury: Clonidine decreases plasma catecholamines. *Crit Care Med* 1990; 18:392-5
  12. Talke PO, Mangano DT, Li J, Hollenberg M, Jain U: Effect of dexmedetomidine on myocardial ischemia in vascular surgery patients (abstract). *ANESTHESIOLOGY* 1993; 79:A60
  13. Segal I, Jarvis D, Duncan S, Shite P, Maze M: Clinical efficacy of transdermal clonidine during the perioperative period. *ANESTHESIOLOGY* 1991; 74:220-5
  14. Ferder L, Inserra F, Medina F: Safety aspects of long-term antihypertensive therapy (10 years) with clonidine. *J Cardiovasc Pharmacol* 1987; 10(suppl 12):S104-8
  15. Sibley D, Benovic J, Caron M, Lefkowitz R: Regulation of transmembrane signaling by receptor phosphorylation. *Cell* 1987; 48:913-22
  16. Reid K, Hayashi Y, Guo T-Z, Correa-Sales C, Nacif-Coelho C, Maze M: Chronic administration of an  $\alpha_2$  adrenergic agonist desensitizes rats to the anesthetic effects of dexmedetomidine. *Pharmacol Biochem Behav* 1994; 47:171-5
  17. Hayashi Y, Guo T-Z, Maze M: Desensitization to the behavioral effects of  $\alpha_2$  adrenergic agonists in rats. *ANESTHESIOLOGY* 1995; 82:954-62
  18. Meller E, Goldstein M, Friedhoff AJ, Schweitzer JW: N-ethoxycarbonyl-2-ethoxy-1,2-dihydroquinoline (EEDQ): A new tool to probe CNS receptor function. *Adv Exp Med Biol* 1988; 235:121-36
  19. Segal I, Vickery R, Walton J, Doze V, Maze M: Dexmedetomidine diminishes halothane anesthetic requirements in rats through a postsynaptic  $\alpha_2$  adrenergic receptor. *ANESTHESIOLOGY* 1988; 69:818-23
  20. Matsumoto M, Zornow MH, Rabin BC, Maze M: The  $\alpha_2$  adrenergic agonist, dexmedetomidine, selectively attenuates ischemia-induced increases in striatal norepinephrine concentrations. *Brain Res* 1993; 627:325-9
  21. Smythe GA, Bradshaw JE, Niving RF: Hypothalamic monoamine control of stress-induced adrenocorticotropin release in the rat. *Endocrinology* 1983; 113:1062-71
  22. Baron BM, Siegel BW: p-[<sup>125</sup>I]iodoclonidine, a novel radiolabeled agonist for studying central  $\alpha_2$  adrenergic receptors. *Mol Pharmacol* 1990; 38:348-56
  23. Correa-Sales C, Rabin B, Maze M: A hypnotic response to dexmedetomidine, an  $\alpha_2$  agonist, is mediated in the locus coeruleus in rats. *ANESTHESIOLOGY* 1992; 76:899-905
  24. Jones B, Moore R: Ascending projections of the locus coeruleus in the rat. II. Autoradiographic study. *Brain Res* 1977; 127:25-53
  25. Bowden DM, German DC, Poynter WD: An autoradiographic, semistereotaxic mapping of major projections from locus coeruleus and adjacent nuclei in macaca mulatta. *Brain Res* 1978; 145:257-76
  26. Crawley J, Mass J, Roth R: Biochemical evidence for simultaneous activation of multiple locus coeruleus efferents. *Life Sci* 1980; 26:1373-8
  27. Meller E, Helmer-Matyjek E, Bohmaker K, Adler C, Friedhoff A, Goldstein M: Receptor reserve at striatal dopamine autoreceptors: Implications for selectivity of dopamine agonists. *Eur J Pharmacol* 1986; 123:311-4
  28. Bohmaker K, Eison A, Yocca F, Meller E: Comparative effects of chronic 8-OH-DPAT, gepirone and ipsapirone treatment on the sensitivity of somatodendritic 5-HT<sub>1A</sub> autoreceptors. *Neuropharmacology* 1993; 32:527-34
  29. Lenox R, Ellis J, Riper D, Ehrlich Y: Alpha<sub>2</sub>-adrenergic receptor-mediated regulation of adenylate cyclase in the intact human platelet. *Mol Pharmacol* 1984; 27:1-9
  30. Adler C, Meller E, Goldstein M: Receptor reserve at the  $\alpha_2$ -adrenergic receptor in the rat cerebral cortex. *J Pharmacol Exp Ther* 1987; 240:508-14
  31. Engberg E, Eriksson E: Effects of  $\alpha_2$ -adrenoceptor agonists on locus coeruleus firing rate and brain noradrenaline turnover in N-ethoxycarbonyl-2-ethoxy-1,2-dihydroquinoline (EEDQ)-treated rats. *Naunyn-Schmiedeberg's Arch Pharmacol* 1991; 343:472-7
  32. Rochette L, Bralet A-M, Bralet J: Effect of chronic clonidine treatment on the turnover of noradrenaline and dopamine in various regions of the rat brain. *Naunyn-Schmiedeberg's Arch Pharmacol* 1982; 319:40-2
  33. Koulu M, Pesonen U, Virtanen R: Chronic dexmedetomidine, a selective  $\alpha_2$  agonist, decreases serotonin but not noradrenaline turnover in rat brainstem nuclei. *Eur J Pharmacol* 1990; 176:151-7
  34. Bylund DB: Subtypes of  $\alpha_2$ -adrenoceptors: Pharmacological and molecular biological evidence converge. *Trends Pharmacol Sci* 1988; 9:356-61
  35. Shreve P, Toews M, Bylund D:  $\alpha_{2A}$ - and  $\alpha_{2C}$ -Adrenoceptor subtypes are differentially down-regulated by norepinephrine. *Eur J Pharmacol* 1991; 207:275-6
  36. Shim C, Andersen N: Minimal alveolar concentration (MAC) and dose-response curves in anesthesia. *ANESTHESIOLOGY* 1972; 36:146-51
  37. Roizen M, Kopin I, Thoa N, Zivin J, Muth E, Jacobowitz D: The effect of two anesthetic agents on norepinephrine and dopamine in discrete brain nuclei, fiber tracts, and terminal regions of the rat. *Brain Res* 1976; 110:515-22
  38. Shapiro H, Greenberg J, Reivich M, Ashmead G, Sokoloff L: Local cerebral glucose uptake in awake and halothane-anesthetized primates. *ANESTHESIOLOGY* 1978; 48:97-103
  39. Peschanski M, Villanueva L, Le Bars D, Bernard J-F: Differential metabolic activity in the brain during deep halothane anesthesia. A qualitative study (<sup>3</sup>H)deoxyglucose. *Neuroscience Letters* 1986; 71:1-6
  40. Mueller R, Smith R, Spruill W, Breese G: Central monoaminergic neuronal effects on minimum alveolar concentration (MAC) of halothane and cyclopropane in rats. *ANESTHESIOLOGY* 1975; 42:143-52
  41. Johnson R, Way W, Miller R: Alteration of anesthetic requirement by amphetamine. *ANESTHESIOLOGY* 1972; 36:357-63
  42. Stoelting R, Creasser C, Martz R: Effect of cocaine administration on halothane MAC in dogs. *Anesth Analg* 1975; 54:422-4
  43. Sprick U: Functional aspects of the involvement of the hippocampus in behavior and memory functions. *Behav Brain Res* 1995; 66(1-2):61-4
  44. King BS, Rampil JJ: Anesthetic depression of spinal motor neurons may contribute to lack of movement in response to noxious stimuli. *ANESTHESIOLOGY* 1994; 81:1484-92
  45. de Sarro G, Asciti C, Froio F, Libri V, Nistico G: Evidence that locus coeruleus is the site where clonidine and drugs acting at  $\alpha_1$  and  $\alpha_2$  adrenoceptors affect sleep and arousal mechanisms. *Br J Pharmacol* 1987; 90:675-85
  46. Correa-Sales C, Rabin B, Maze M: A hypnotic response to dexmedetomidine, an  $\alpha_2$  agonist, is mediated in the locus coeruleus in rats. *ANESTHESIOLOGY* 1992; 76:948-52
  47. Guo T-Z, Buttermann AE, Jiang J-Y, Maze M: Dexmedetomidine injection into the locus coeruleus produces analgesia. *ANESTHESIOLOGY* 1996; 84:873-81
